# Supplementary material for: Optimized RNP transfection for highly efficient CRISPR/Cas9-mediated gene knockout in primary T cells
Source: PubMed Central journal article supplement (PMC5839763; doi:10.1084/jem.20171626), 2018-03-05
Supplement: JEM_20171626_sm.pdf [file JEM_20171626_sm.pdf]

## SUPPLEMENTAL MATERIAL

Seki and Rutz, <https://doi.org/10.1084/jem.20171626>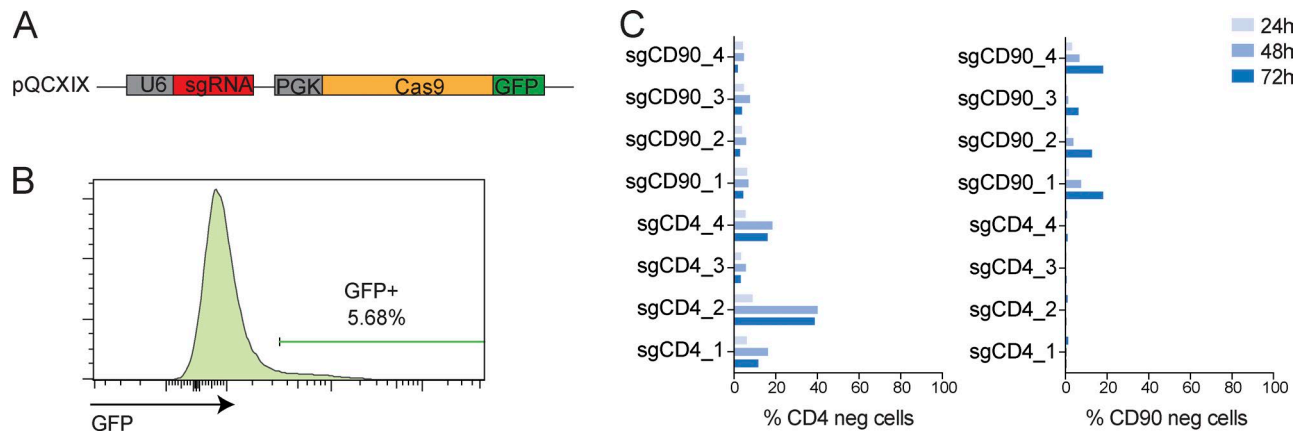

Figure S1. **Low efficiency of retroviral transduction of sgRNA/Cas9 all-in-one construct in primary CD4<sup>+</sup> T cells.** (A) Schematic depiction of all-in-one retroviral construct expressing a sgRNA from a U6 polymerase III promoter and a Cas9/GFP fusion protein from a PGK promoter. (B) Expression of the retroviral construct as measured by GFP expression 48 h after retroviral transduction in CD4<sup>+</sup> mouse T cells (gated on live cells). (C) Percentage CD4 or CD90 negative (KO) T cells 24, 48, and 72 h after retroviral transduction with sgRNA/Cas9 constructs targeting either CD4 or CD90 in CD4<sup>+</sup> T cells (gated on live GFP<sup>+</sup> cells). Data are representative of two independent experiments.

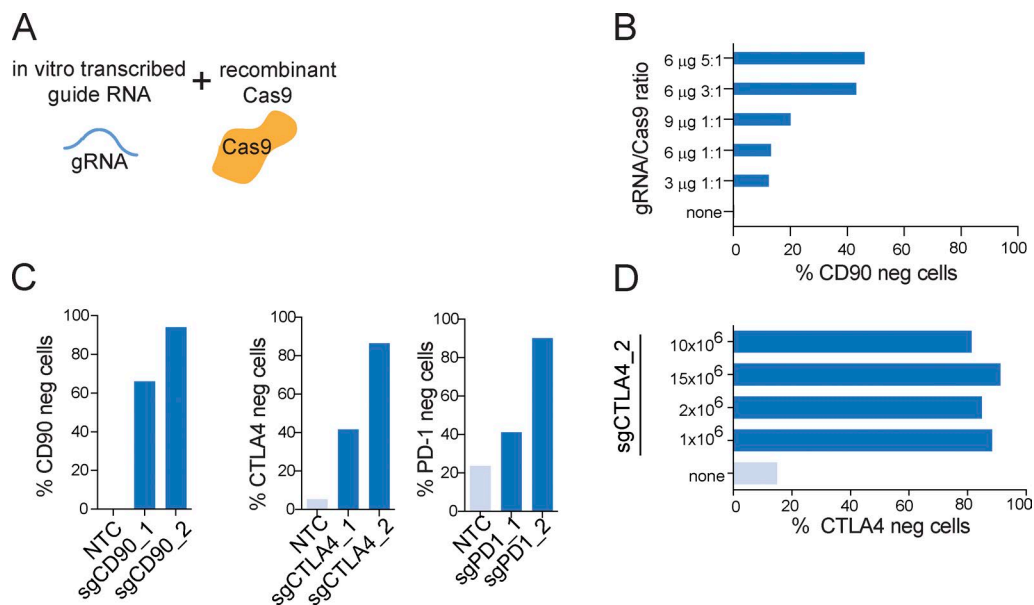

Figure S2. **Electroporation of in vitro transcribed sgRNA and recombinant Cas9 protein leads to highly efficient gene KO in primary T cells.** (A) Schematic depiction of RNP components, in vitro-transcribed sgRNA, and recombinant Cas9 protein. (B) Titration of amount and ratio of sgRNA/Cas9 targeting CD90 in activated mouse CD8<sup>+</sup> T cells. Data are representative of two independent experiments. (C) KO efficiency as measured by flow cytometry 3 d after RNP transfection targeting CD90, CTLA4, and PD1 in activated mouse CD8<sup>+</sup> T cells. Data are representative of two independent experiments. (D) Titration of number of activated mouse CD8<sup>+</sup> T cells transfected with sgRNA targeting CD90. Data are representative of two independent experiments.

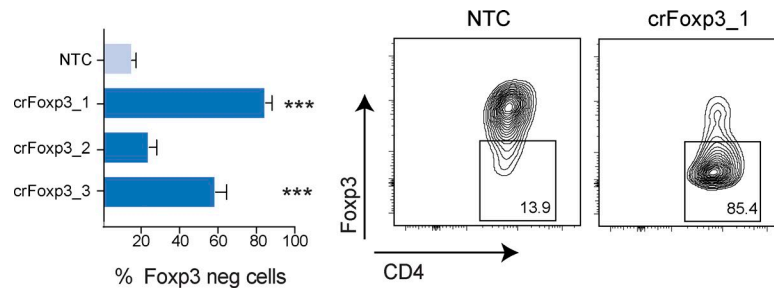

Figure S3. **KO of Foxp3 in expanded human regulatory T cells.** KO efficiency of targeting FoxP3 in human regulatory T cells expanded in vitro for 7 d was analyzed by flow cytometry 72 h after RNP transfection. Data are presented as mean  $\pm$  SD ( $n = 2$ ) and representative of two independent experiments. \*\*\*,  $P < 0.001$  by one-way ANOVA.

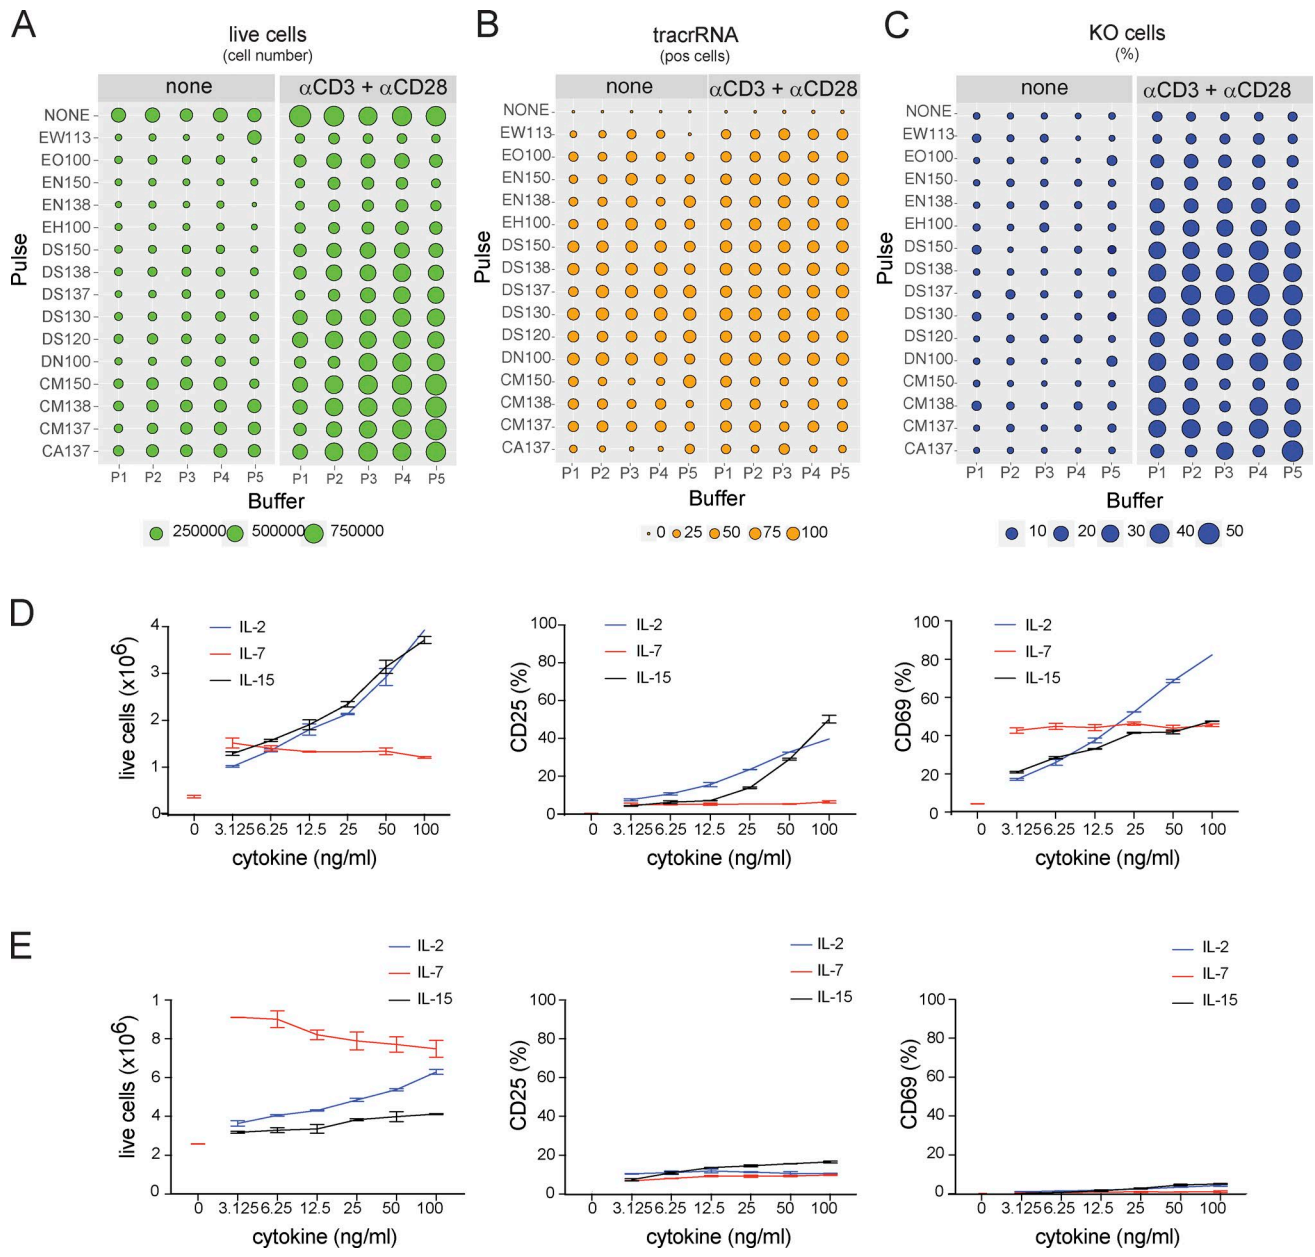

Figure S4. **Optimization of RNP transfection conditions in nonactivated mouse T cells.** (A–C) Systematic optimization of nucleofection parameters for RNP transfection of nonactivated mouse CD8<sup>+</sup> T cells. Cell viability (A), transfection efficiency as determined by tracrRNA positive cells (B), and KO efficiency (%; C) of mouse CD8<sup>+</sup> T cells transfected with RNP targeting CD90 and cultured for 2 d either without any stimulation or with anti-CD3/anti-CD28 stimulation. Data are from one experiment. (D and E) Analysis by flow cytometry of viable cells and CD25 and CD69 expression after 3 d of culture and titration of IL-2, IL-7, or IL-15 in CD8<sup>+</sup> (D) or CD4<sup>+</sup> mouse T cells (E). Data are presented as mean  $\pm$  SD ( $n = 2$ ) and representative of two independent experiments.

Table S1. **gRNA sequences**

| Name                              | Sequence (5'-3')                        | Name     | Sequence (5'-3')     |
|-----------------------------------|-----------------------------------------|----------|----------------------|
| <b>sgRNA (plasmid constructs)</b> |                                         |          |                      |
| mCd4_1                            | ACTCCTAGCTGTCACTCAA                     | mCd90_1  | ATGGCGGCAGTCCAGGCCGA |
| mCd4_2                            | AAGGGAAGACGCTGGTGCT                     | mCd90_2  | CTTGGTGTATTCTCATGG   |
| mCd4_3                            | TAAGTTTATTGATGATGAG                     | mCd90_3  | TGCTGGATGGAGTTATCCT  |
| mCd4_4                            | AGAGTTGCTATCCAAGGTC                     | mCd90_4  | CTTCTCTTCTCTCGGGTC   |
| <b>sgRNA (IVT)</b>                |                                         |          |                      |
| mCd90_1                           | GGCGAAGGTTTTGGTTCACC                    | mCtla4_1 | GACCCAACCTTCAGTGGTGT |
| mCd90_2                           | AAAGTAGTCGCCCTCATCCT                    | mCtla4_2 | ATGGAAAGCTGGCGACACCA |
| mPd1_1                            | CGGAGGATCTTATGCTGAAC                    |          |                      |
| mPd1_2                            | GACACACGGCGCAATGACAG                    |          |                      |
| <b>crRNA</b>                      |                                         |          |                      |
| mPd1_1                            | ACAGCCCAAGTGAATGACCA                    | hCXCR4_1 | GAAGCGTGATGACAAAGAGG |
| mPd1_2                            | TGAATGACCAGGTACCTGC                     | hCXCR4_2 | AGGGAAGCGTGATGACAAAG |
| mPd1_3                            | AGTTGAGCTGGCAATCAGGG                    | hCXCR4_3 | ACGGCATCAACTGCCAGAA  |
| mCtla4_1                          | AGGTCCGGGTGACTGTGCTG                    | hCCR7_1  | TACCTACCTGCTCAACCTGG |
| mCtla4_2                          | GACAAATGACCAAATGACTG                    | hCCR7_2  | CATCAGCATTGACCGCTACG |
| mCtla4_3                          | ATGGAAAGCTGGCGACACCA                    | hCCR7_3  | AAAGTGGACACCGAAGACCC |
| mCd90_1                           | CCGCCATGAGAATAACACCA                    | hCD127_1 | TCAGGCACCTTACCTCCACG |
| mCd90_2                           | CCTTGGTGTATTCTCATGG                     | hCD127_2 | CAGGCACCTTACCTCCACGA |
| mCd90_3                           | GAGCAGGAGAGCGACGCTGA                    | hCD127_3 | CAAGTCGTTTCTGGAGAAAG |
| mCd8a_1                           | ATCCCAACAAGATAACGT                      | hIFNG_1  | CCAGAGCATCCAAAAGAGTG |
| mCd8a_2                           | TGAAGCCATATAGACAACGA                    | hIFNG_2  | AAAGAGTGTGGAGACCATCA |
| mCd8a_3                           | TGGGTGAGTCGATTATCCTG                    | hIFNG_3  | TGCAGGTCATTGAGATGTAG |
| mFoxp3_1                          | TGGACGCACTTGGAGCACAG                    | hFOXP3_1 | CTTGAGGGAGAAGACCCAG  |
| mFoxp3_2                          | TCTACCCACAGGATCAATG                     | hFOXP3_2 | GAGGGAGAAGACCCAGTGG  |
| mFoxp3_3                          | CTTGAGGGAGAAGACCCAG                     | hFOXP3_3 | GGGTGCACCTGCAGCACAG  |
| NTC                               | Negative control crRNA #1 (IDT 1072544) | hPD1_1   | CTGCAGCTTCTCCAACACAT |
|                                   |                                         | hPD1_2   | CGTGTACACAACTGCCCAA  |
|                                   |                                         | hPD1_3   | GCCCTGGCCAGTCGTCTGGG |
|                                   |                                         | hCTLA4_1 | CCAGGTGACTGAAGTCTGTG |
|                                   |                                         | hCTLA4_2 | CACTGTACCCCGACCTCAG  |
|                                   |                                         | hCTLA4_3 | GCACGTGGCCAGCCTGCTG  |
|                                   |                                         | hTIGIT_1 | CAGGCACAATAGAAACAACG |
|                                   |                                         | hTIGIT_2 | GACCTGGGTCACTTGTGCCG |
|                                   |                                         | hTIGIT_3 | CAGGCATGCTTCTGCCAG   |
